# Supplementary material for: Chemotherapie: Die Folgen lindern
Source: Springer Nature journal article supplement (doi:10.1007/s00058-021-2200-3), 2022-02-01
Supplement: MOESM1 [file 20095884]

## Literatur

### zum Beitrag „Chemotherapie: Die Folgen lindern“ von Martina Spalt

Heilberufe (74) 2/2022, S. 19-21

Bakitas, M.A. (2006) Background noise: The experience of chemotherapy-induced peripheral neuropathy. *Nursing Research*, 56(5): 323-31,doi: 10.1097/01.NNR.0000289503.22414.79

Beets, G., Sebag-Montefiore, D., Andritsch, E., Arnold, D., Beishon, M., Crul, M., Dekker, J.W., Delgado-Bolton, R., Flejou, J.F., Grisold, W., Henning, G., Laghi, A., Lovey, J., Negrouk, A., Pereira, P., Roca, P., Saarto, T., Seufferlein, Th., Taylor, C., Ugolini, G., Van der Velde, C., Van Herck, B., Yared, W., Costa, A., Naredi, P. (2017). ECCO Essential Requirements for Quality Cancer Care: Colorectal Cancer. A critical review. *Critical Reviews in Oncology/Hematology*, 110, 81-93. doi: <https://doi.org/10.1016/j.critrevonc.2016.12.001>

Boehmke, M.M., Dickerson, S.S. (2005). Symptom, symptom experiences, and symptom distress encountered by women with breast cancer undergoing current treatment modalities, *Cancer Nursing*, Sep-Oct 2005;28(5):382-9.doi: 10.1097/00002820-200509000-00008

Czypionka, Th., Achleitner, S. (2018). Health System Watch. Patient Reported Outcome and Experience Measures. Accessed, 26.08.2021 <https://www.sozialversicherung.at/cdscontent/load?contentid=10008.713301&version=1547456650>

Fischer, G.C. (2005). Diagnostisches Denken in der Medizin. In Schmoll, D., & Kuhlmann, A. (Hg.) *Symptom und Phänomen. Phänomenologische Zugänge zum kranken Menschen*. Freiburg/München: Verlag Karl Alber GmbH

Jordan, B., Margulies, A., Cardoso, F., Cavaletti, G., Haugnes, H.S., Jahn, P., Le Rhun, E., Preusser, M., Scotté, F., Taphoorn, M.J.B. & Jordan, K. (2020). Systemic anticancer therapy-induced peripheral and central neurotoxicity: ESMO EONS EANO Clinical Practice Guidelines for diagnosis, prevention, treatment and follow-up. *Annals of Oncology*. Accessed, 29.07.2021 [https://www.annalsofoncology.org/article/S0923-7534\(20\)39938-5/fulltext](https://www.annalsofoncology.org/article/S0923-7534(20)39938-5/fulltext)

Kaufmann-Molnár, I., Hofmann Checchini, H., Fringer, A. (2019). Chemotherapeutische Nebenwirkungen bei Kolonkarzinom- eine qualitative Studie aus Betroffenenensicht. *Pflege*, 1-8, doi: <https://doi.org/10.1024/1012-5302/a000676>

Knoerl, R., Mazzola, E., Hong, F., Salehi, E., McCleary, N., Ligibel, J., Reyes, K., Berry, D. (2021). Exploring the impact of a decision support algorithm to improve clinicians´ chemotherapy-induced peripheral neuropathy assessment and management practices: a two-phase, longitudinal study. *BMC Cancer*, 21, 236. doi: <https://doi.org/10.1186/s12885-021-07965-8>

Leitlinienprogramm Onkologie (Deutsche Krebsgesellschaft, Deutsche Krebshilfe, AWMF): *Supportive Therapie bei onkologischen PatientInnen - Langversion 1.3, 2020*, AWMF Registernummer: 032/054OL. Accessed, 30.07.2021 <https://www.leitlinienprogrammonkologie.de/leitlinien/supportive-therapie/>

Molassiotis, A., Cheng, H.L., Lopez, V., Au, J.S.K., Chan, A., Bandla, A., Leung, K.T., Li, Y.C., Wong, K.H., Suen, L.K.P., Chan, Ch.w., Yorke, J., Farrell, C., Sundar, R. (2019). Are we misestimating chemotherapy-induced peripheral neuropathy? Analysis of assessment methodologies from a prospective, multinational, longitudinal cohort study of patients receiving neurotoxic chemotherapy. *BMC Cancer*, 132, 1-19. doi: <https://doi.org/10.1186/s12885-019-5302-4>

NCI Symptom Management and Quality of Life Steering Committee (2010). *Chemotherapy- Induced Peripheral Neuropathy. Clinical Trials Planning Meeting Executive Summary*. Accessed, 5.7.2021 <https://www.cancer.gov/about-nci/organization/ccct/steering-committees/ncorp/symptom-management/cipn-ctpm-final-executive-summary-for-ccct-aug-2010.pdf>

Olbrich, Ch. (2018). *Pflegekompetenz*. Bern: Hogrefe

Schrems, B.M. (2007). Standardisierte Assessmentinstrumente im Lichte der Hermeneutik. *Pflege*, 20(4), 218-224. DOI: 10.1024/1012-5302.20.4.218

Seretny, M., Currie, G.L., Sena, E.S., Ramnarine, S., Grant, R., MacLeod, M.R., Colvin, L.A., Fallon M. (2014). Incidence, prevalence, and predictors of chemo-therpay-induced peripheral neuropathy: A systematic review and meta-analysis. *Pain*, 155 (12), 2461-2470. doi: 10.1016/j.pain.2014.09.020

Statistik Austria (2021). # Lebenserwartung. Accessed, 31.7.2021 <https://de.statista.com/statistik/daten/studie/18642/umfrage/lebenserwartung-in-oesterreich/>

Tanay, M.A.L., Armes, J. & Ream, E. (2017). The experience of chemotherapy-induced peripheral neuropathy in adult cancer patients: a qualitative thematic synthesis, *European Journal of Cancer Care*, 26, e12443, doi: 10.1111/ecc.12443

Toftthagen, C. (2010). Patient Perceptions Associated with Chemotherapy-Induced Peripheral Neuropathy, *Clinical Journal of Oncology Nursing*, 14 (3), E22-E28. doi: 10.1188/10.CJON.E22-E28

Uzarewicz, Ch., & Moers, M. (2012). Leibphänomenologie für Pflegewissenschaft – eine Annäherung. *Pflege und Gesellschaft*. Accessed, 29.07.2021 <https://dq-pflegewissenschaft.de/wp-content/uploads/2017/12/PG-2-2012.pdf>
